# Supplementary material for: Identifying Vulnerable Population in the Urban Society: a Case Study of Wuhan, China
Source: Copernicus journal article supplement (doi:10.5194/nhess-2022-277), 2023-01-23
Supplement: Supplementary file [file nhess-2022-277-AC1-supplement.pdf]

Dear Ms. Guochun Wu,

We highly appreciate your kind comments and suggestions to our manuscript. Your comments indeed make us have a deeper understanding on the subject of the paper, and the manuscript has been carefully revised according to your comments.

The answers for the questions and comments are as follows.

### 1. Table 2

In the fifth column, some indicators have only one correlation, and some have two. The readers would be better understood if the authors identified positive and negative correlations for all indicators.

Authors' responses:

Thanks for your valuable comments. We've made two revisions in Table 2 according to your suggestion, that's highlighted in red.

**Table 2** The Evaluation Index of Social Vulnerability

| <b>Index</b> | <b>Indicator</b>        | <b>Description</b>                                                                  | <b>Source</b>                                                          | <b>Positive correlation (+) or negative correlation (-) to vulnerability</b> |
|--------------|-------------------------|-------------------------------------------------------------------------------------|------------------------------------------------------------------------|------------------------------------------------------------------------------|
| Exposure     | Geographical location   | Proximity to dangerous areas such as steep slope, riverbank, sea-shore, etc.        | Pelling 2003, Moss et al. 2001.                                        | Geographical location (+)                                                    |
|              | Building                | Flimsy constructions unable to withstand hazard impacts.                            | Wisner et al. 2004                                                     | Building fragility (+)                                                       |
|              | Public infrastructure   | Unavailability of critical public infrastructure.                                   | Moss et al. 2001, Cutter et al. 2003, Vincent 2004                     | Access to public facilities (-)                                              |
| Sensitivity  | Health/physical ability | Physical ability of an individual or a group of people to withstand hazard impacts. | McCarthy et al. 2001, Pelling 2003, Moss et al. 2001, Hahn et al. 2009 | <b>Bad physical condition (+)</b><br><b>Good physical condition (-)</b>      |
|              | Livelihood stability    | Unstable livelihoods not conducive to increasing income, easily leading to poverty. | Marshall et al. 2007                                                   | Unstable livelihood (+)                                                      |
|              | Debt                    | Ways of life beyond mere subsistence level and lacks of long-term                   | Ramprasad 2019                                                         | Debt (+)                                                                     |

|                   |                       |                                                                                                                                                                                                                           |                                                                |                                                                                                                                   |
|-------------------|-----------------------|---------------------------------------------------------------------------------------------------------------------------------------------------------------------------------------------------------------------------|----------------------------------------------------------------|-----------------------------------------------------------------------------------------------------------------------------------|
|                   |                       | investment in disaster reduction.                                                                                                                                                                                         |                                                                |                                                                                                                                   |
|                   | Renters               | Lacks of access to costly housings and of sufficient shelter options.                                                                                                                                                     | Cutter et al. 2003                                             | Renters (+)                                                                                                                       |
| Adaptive capacity | Social inclusion      | No participation in local decision-making leading to social marginalization concerning social identity, self-identification, rights, opportunities, participation, etc.                                                   | Yang 2015                                                      | Social inclusion (-)                                                                                                              |
|                   | Education             | Ability to understand warning information and access to recovery information.                                                                                                                                             | Cutter et al. 2003, Coulibaly et al. 2015                      | Low education (+)<br>High education (-)                                                                                           |
|                   | Family structure      | A large number of people under the age of 18 and over 65 depending on more energy and resources to adapt to disasters.                                                                                                    | Vincent 2004<br>Hahn et al. 2009,<br>Coulibaly et al. 2015     | With the family member under the age of 18 and/or over 65 (+)<br>Without the family member under the age of 18 and/or over 65 (-) |
|                   | Social capital        | Access to information and resources, building trust and cohesion to reduce vulnerability.                                                                                                                                 | Mpanje et al. 2018, Hahn et al. 2009                           | Social capital (-)                                                                                                                |
|                   | Social insurance      | Normal hedge against losses caused by risks, lacking the ability to overcome adverse effects.                                                                                                                             | Burton et al. 1993, McCarthy et al. 2001, IPCC 2014            | Social security (-)                                                                                                               |
|                   | Social security       | Sufficient social welfare to improve living conditions, thereby enhancing disaster resilience, for example pensions or allowance increasing future expectations for the younger and guarantee subsistence of the elderly. | Vincent 2004,<br>Wisner et al. 2004,<br>Adger and Vincent 2005 | Social welfare (-)                                                                                                                |
|                   | Disaster awareness    | Lack of disaster awareness and experience which may impair the basic skills needed to protect oneself.                                                                                                                    | Wisner et al. 2004                                             | Awareness of disaster (-)                                                                                                         |
|                   | Disaster preparedness | Inadequate disaster preparedness, for example food, water, rope etc., to reduce the ability to respond to disasters.                                                                                                      | Wisner et al. 2004                                             | Disaster preparedness (-)                                                                                                         |

### 2. 3.3 data collection and analysis

The analysis is based on a questionnaire. There is a lack of a table showing which specific questions make up the variables.

Authors' responses:

Thanks for your valuable comments. Given there are many tables in this paper, no new tables have been added. The questions of displaying each variable have been inserted into Table 4 and mentioned in the article. And the revised parts are marked in red.

In June and July of 2021, the preliminary interviews and the questionnaire surveys were conducted, respectively. First, we designed the questionnaires using the social vulnerability index (see Table 4) and the preliminary interviews with local residents.....

**Table 4** The determined and normalized variables

| Serial number | Variable                | Description of Questions                                                                                                                                                                                                         | Max | Min | Mean value | SD     |
|---------------|-------------------------|----------------------------------------------------------------------------------------------------------------------------------------------------------------------------------------------------------------------------------|-----|-----|------------|--------|
| 1             | Geographical location   | Respondent's perception of the safety of his/her living place                                                                                                                                                                    | 1   | 0   | 0.4372     | 0.1982 |
| 2             | Building                | Respondent's evaluation of the safety of his/her housing                                                                                                                                                                         | 1   | 0   | 0.4265     | 0.2103 |
| 3             | Critical infrastructure | a. Respondent's evaluation of the complete of his/her surrounding disaster prevention facilities (shelters, drainage facilities, embankments)<br>b. Respondent's evaluation of the convenience of his/her surrounding facilities | 1   | 0   | 0.5245     | 0.2063 |
| 4             | Health/Physical ability | Respondent's perception of his/her physical condition                                                                                                                                                                            | 1   | 0   | 0.2872     | 0.2594 |
| 5             | Livelihood stability    | Respondent's perception of the stability of his/her occupation (income)                                                                                                                                                          | 1   | 0   | 0.3863     | 0.2852 |
| 6             | Debt                    | Respondent whether he/she has loans                                                                                                                                                                                              | 1   | 0   | 0.1957     | 0.5076 |
| 7             | Renters                 | Respondent whether he/she owns or rents the house                                                                                                                                                                                | 1   | 0   | 0.4599     | 0.5402 |
| 8             | Social inclusion        | Respondent's perception of integration into local society                                                                                                                                                                        | 1   | 0   | 0.2772     | 0.1788 |
| 9             | Education               | Respondent's education level                                                                                                                                                                                                     | 1   | 0   | 0.6064     | 0.2819 |
| 10            | Family structure        | In the respondent's family, the proportion of children to be supported and the elderly to the total family population                                                                                                            | 1   | 0   | 0.3871     | 0.2877 |
| 11            | Social capital          | a. Respondent's evaluation about whether quickly get help from his/her family, relatives                                                                                                                                         | 1   | 0   | 0.4526     | 0.2078 |

|    |                       |                                                                                                                                                              |   |   |        |        |
|----|-----------------------|--------------------------------------------------------------------------------------------------------------------------------------------------------------|---|---|--------|--------|
|    |                       | or friends after he/she has suffered disaster losses                                                                                                         |   |   |        |        |
|    |                       | b. Respondent's evaluation about whether quickly get help from the community, government or NGOs after he/she suffers from disaster losses                   |   |   |        |        |
| 12 | Social insurance      | Respondent's evaluation of the sufficient of his/her insurance (such as personal safety insurance, housing insurance, other family property insurance, etc.) | 1 | 0 | 0.6614 | 0.3023 |
| 13 | Social security       | Respondent's evaluation of the sufficient of his/her social security (such as medical security, pension, etc.)                                               | 1 | 0 | 0.4603 | 0.2578 |
| 14 | Disaster awareness    | a. Respondent's evaluation of his/her disaster knowledge and experience<br>b. Respondent's awareness about disasters in their living place                   | 1 | 0 | 0.5004 | 0.1647 |
| 15 | Disaster preparedness | a. Respondent's preparedness for disaster prevention and escape<br>b. Respondent's experience about participated in disaster drills                          | 1 | 0 | 0.7051 | 0.2973 |

---
