# Supplementary material for: Identifying Vulnerable Population in the Urban Society: a Case Study of Wuhan, China
Source: Copernicus journal article supplement (doi:10.5194/nhess-2022-277), 2023-01-23
Supplement: Supplementary file [file nhess-2022-277-CC1-supplement.pdf]

Comment on nhess-2022-277

**1. Table 2**

In the fifth column, some indicators have only one correlation, and some have two. The readers would be better understood if the authors identified positive and negative correlations for all indicators.

**2. 3.3 data collection and analysis**

The analysis is based on a questionnaire. There is a lack of a table showing which specific questions make up the variables.
